# Supplementary material
Source: MDPI journal article supplement (https://www.mdpi.com/2078-1547/14/3/33)
Supplement: s1 [file s1]

Archive with 3 entries (3 files):
- supplemental file/S1_Planetary Health European Hub Amsterdam Convening Agenda.pdf
- supplemental file/S2_Participants and Organizations Planetary Health European Hub Amsterdam September 2022.pdf
- supplemental file/S3_Background of the Convening environment at ARTIS .pdf
